# Supplementary material
Source: Research Square preprint supplement (doi:10.21203/rs.3.rs-9246216/v1)
Supplement: Supplementary file 1 [file 2ec8e586fb92696a985a415a.doc]

**Table 1** Characteristics of peak values in each year used in explicit diseases models.

| Disease | Trend | Year | Peak (per 10-5) | Peak month | Epidemic threshold | Threshold intensity | | | Level |
| --- | --- | --- | --- | --- | --- | --- | --- | --- | --- |
| Medium | High | Very high |
| Influenza | Upward | 2005 | 0.29 | 12 | 7.57 | 7.57 | 6.44 | 20.58 | 1 |
| 2006 | 0.59 | 3 | 6.72 | 6.72 | 6.77 | 23.23 | 1 |
| 2007 | 0.73 | 1 | 6.72 | 6.72 | 6.49 | 21.01 | 1 |
| 2008 | 1.17 | 1 | 6.72 | 6.72 | 6.17 | 19.33 | 1 |
| 2009 | 11.02 | 9 | 7.55 | 7.55 | 4.16 | 13.03 | 4 |
| 2010 | 1.04 | 12 | 7.55 | 7.55 | 6.53 | 22.82 | 1 |
| 2011 | 1.15 | 1 | 7.57 | 7.57 | 12.81 | 47.47 | 1 |
| 2012 | 1.61 | 12 | 20.27 | 20.27 | 21.52 | 87.41 | 1 |
| 2013 | 5.99 | 1 | 18.12 | 18.12 | 40.24 | 176.63 | 1 |
| 2014 | 22.20 | 12 | 18.99 | 18.99 | 87.58 | 406.31 | 3 |
| 2015 | 6.97 | 1 | 18.12 | 18.12 | 93.75 | 444.91 | 1 |
| 2016 | 24.39 | 12 | 18.12 | 18.12 | 74.24 | 343.18 | 3 |
| 2017 | 92.22 | 12 | 7.57 | 7.57 | 76.11 | 346.91 | 4 |
| 2018 | 184.41 | 1 | 18.12 | 18.12 | 57.75 | 246.08 | 4 |
| 2019 | 491.40 | 1 | 18.12 | 18.12 | 35.65 | 127.70 | 5 |
| HFRS | Downward | 2005 | 0.12 | 4 | 0.00 | 0.01 | 0.03 | 0.04 | 5 |
| 2006 | 0.06 | 4 | 0.00 | 0.01 | 0.04 | 0.06 | 4 |
| 2007 | 0.02 | 4 | 0.00 | 0.02 | 0.05 | 0.08 | 3 |
| 2008 | 0.02 | 5 | 0.00 | 0.02 | 0.05 | 0.08 | 3 |
| 2009 | 0.01 | 10 | 0.00 | 0.02 | 0.05 | 0.08 | 2 |
| 2010 | 0.01 | 6 | 0.00 | 0.02 | 0.05 | 0.08 | 2 |
| 2011 | 0.03 | 5 | 0.00 | 0.01 | 0.03 | 0.04 | 4 |
| 2012 | 0.03 | 5 | 0.00 | 0.01 | 0.02 | 0.03 | 5 |
| 2013 | 0.03 | 3 | 0.00 | 0.01 | 0.02 | 0.02 | 5 |
| 2014 | 0.01 | 5 | 0.00 | 0.01 | 0.02 | 0.03 | 3 |
| 2015 | 0.01 | 6 | 0.00 | 0.01 | 0.02 | 0.03 | 3 |
| 2016 | 0.01 | 5 | 0.00 | 0.01 | 0.02 | 0.03 | 2 |
| 2017 | 0.01 | 5 | 0.00 | 0.01 | 0.02 | 0.03 | 3 |
| 2018 | 0.01 | 9 | 0.00 | 0.01 | 0.02 | 0.03 | 3 |
| 2019 | 0.01 | 2 | 0.00 | 0.01 | 0.02 | 0.03 | 2 |
| Measles | Downward | 2005 | 3.53 | 5 | 0.72 | 0.72 | 5.14 | 12.97 | 3 |
| 2006 | 4.65 | 4 | 0.88 | 0.88 | 4.86 | 12.04 | 3 |
| 2007 | 2.39 | 5 | 0.97 | 0.97 | 5.46 | 13.99 | 3 |
| 2008 | 1.85 | 5 | 1.01 | 1.01 | 5.65 | 14.58 | 3 |
| 2009 | 1.43 | 4 | 1.00 | 1.00 | 5.95 | 15.46 | 3 |
| 2010 | 3.48 | 5 | 0.98 | 0.98 | 5.25 | 13.31 | 3 |
| 2011 | 0.14 | 5 | 0.75 | 0.87 | 5.13 | 11.25 | 1 |
| 2012 | 0.07 | 3 | 0.46 | 0.54 | 4.71 | 12.26 | 1 |
| 2013 | 0.61 | 5 | 0.46 | 0.46 | 3.86 | 11.88 | 3 |
| 2014 | 2.88 | 4 | 0.40 | 0.40 | 2.18 | 6.57 | 4 |
| 2015 | 1.46 | 3 | 0.40 | 0.40 | 2.58 | 8.23 | 3 |
| 2016 | 2.50 | 3 | 0.41 | 0.41 | 2.47 | 7.74 | 4 |
| 2017 | 0.04 | 11 | 0.44 | 0.44 | 3.18 | 9.42 | 1 |
| 2018 | 0.20 | 3 | 0.40 | 0.40 | 3.30 | 10.45 | 1 |
| 2019 | 0.07 | 4 | 0.44 | 0.44 | 3.17 | 9.38 | 1 |

**Table 2** Characteristics of peak values in each year used in latent diseases models.

| Disease | Trend | Year | Peak (per 10-5) | Peak month | Epidemic threshold | Threshold intensity | | | Level |
| --- | --- | --- | --- | --- | --- | --- | --- | --- | --- |
| Medium | High | Very high |
| AIDS | Upward | 2005 | 0.17 | 11 | 0.40 | 0.52 | 1.12 | 1.58 | 1 |
| 2006 | 0.30 | 8 | 0.41 | 0.48 | 1.21 | 1.83 | 1 |
| 2007 | 0.45 | 6 | 0.42 | 0.46 | 1.21 | 1.87 | 2 |
| 2008 | 0.44 | 11 | 0.39 | 0.46 | 1.22 | 1.86 | 2 |
| 2009 | 0.41 | 7 | 0.39 | 0.46 | 1.21 | 1.87 | 2 |
| 2010 | 0.47 | 7 | 0.41 | 0.45 | 1.21 | 1.86 | 3 |
| 2011 | 0.65 | 12 | 0.40 | 0.54 | 1.24 | 1.78 | 3 |
| 2012 | 0.91 | 8 | 0.43 | 0.61 | 1.29 | 1.80 | 3 |
| 2013 | 1.03 | 12 | 0.32 | 0.67 | 1.34 | 1.83 | 3 |
| 2014 | 1.26 | 12 | 0.45 | 0.73 | 1.30 | 1.66 | 3 |
| 2015 | 1.36 | 12 | 0.45 | 0.73 | 1.29 | 1.65 | 4 |
| 2016 | 1.13 | 12 | 0.45 | 0.74 | 1.32 | 1.70 | 3 |
| 2017 | 1.15 | 6 | 0.45 | 0.74 | 1.31 | 1.69 | 3 |
| 2018 | 1.11 | 12 | 0.45 | 0.74 | 1.33 | 1.71 | 3 |
| 2019 | 0.91 | 4 | 0.45 | 0.75 | 1.36 | 1.76 | 3 |
| HFMD | Upward | 2005 | 0.27 | 7 | 4.23 | 16.24 | 69.87 | 133.18 | 1 |
| 2006 | 2.48 | 6 | 4.24 | 11.08 | 123.82 | 359.84 | 1 |
| 2007 | 16.15 | 7 | 4.17 | 9.01 | 122.57 | 388.59 | 3 |
| 2008 | 30.55 | 5 | 4.24 | 8.47 | 115.06 | 364.55 | 3 |
| 2009 | 20.58 | 5 | 4.18 | 8.56 | 117.12 | 372.29 | 3 |
| 2010 | 55.18 | 6 | 3.86 | 7.90 | 100.74 | 310.28 | 3 |
| 2011 | 29.69 | 6 | 4.27 | 16.35 | 70.27 | 133.86 | 3 |
| 2012 | 49.51 | 6 | 4.37 | 21.25 | 45.83 | 64.37 | 4 |
| 2013 | 43.21 | 7 | 4.38 | 24.70 | 47.63 | 63.67 | 3 |
| 2014 | 56.99 | 6 | 3.74 | 22.58 | 45.27 | 61.57 | 4 |
| 2015 | 33.05 | 6 | 4.48 | 23.65 | 49.86 | 69.33 | 3 |
| 2016 | 28.88 | 7 | 4.29 | 23.72 | 50.25 | 70.03 | 3 |
| 2017 | 17.45 | 7 | 4.47 | 25.28 | 50.38 | 68.33 | 2 |
| 2018 | 40.39 | 8 | 4.47 | 23.32 | 48.45 | 66.93 | 3 |
| 2019 | 14.16 | 8 | 4.50 | 25.88 | 49.37 | 65.69 | 2 |
| Viral hepatitis | Downward | 2005 | 4.46 | 9 | 0.00 | 2.17 | 4.66 | 6.52 | 3 |
| 2006 | 6.11 | 4 | 4.69 | 4.69 | 4.25 | 5.77 | 5 |
| 2007 | 5.83 | 1 | 4.69 | 4.69 | 4.46 | 6.16 | 4 |
| 2008 | 3.68 | 3 | 4.69 | 4.69 | 4.91 | 6.97 | 1 |
| 2009 | 3.07 | 3 | 4.69 | 4.69 | 5.07 | 7.24 | 1 |
| 2010 | 2.48 | 1 | 4.69 | 4.69 | 5.14 | 7.35 | 1 |
| 2011 | 2.38 | 3 | 0.00 | 2.06 | 4.63 | 6.63 | 3 |
| 2012 | 1.87 | 3 | 0.00 | 1.87 | 3.68 | 4.97 | 3 |
| 2013 | 1.86 | 1 | 0.00 | 1.75 | 2.86 | 3.55 | 3 |
| 2014 | 1.47 | 1 | 0.00 | 1.66 | 2.43 | 2.88 | 2 |
| 2015 | 1.70 | 1 | 0.00 | 1.65 | 2.43 | 2.87 | 3 |
| 2016 | 1.71 | 1 | 0.00 | 1.66 | 2.42 | 2.86 | 3 |
| 2017 | 1.47 | 5 | 0.00 | 1.65 | 2.44 | 2.89 | 2 |
| 2018 | 2.01 | 1 | 0.00 | 1.62 | 2.41 | 2.87 | 3 |
| 2019 | 1.70 | 1 | 0.00 | 1.65 | 2.43 | 2.88 | 3 |

**Table 3** Association of pollutions and climate factors with incidence threshold and mortality of six viral infectious diseases. The parameter estimates for the WQS mixture (βWQS) are reported in bold for significant WQS effects. (n/a: not applicable)

| Series | Diseases | Direction | βWQS (95%CI) | p-Value |
| --- | --- | --- | --- | --- |
| Incidence threshold | AIDS | Positive | **0.38(0.21,0.55)** | **0.00315**** |
| Negative | **-0.74(-1.15,-0.33)** | **0.00978**** |
| Influenza | Positive | n/a | n/a |
| Negative | **-113.54(-202.66,-24.42)** | **0.0412*** |
| HFMD | Positive | 9.25(-11.66,30.16) | 0.419 |
| Negative | **-23.72(-42.57,-4.87)** | **0.0487*** |
| Viral hepatitis | Positive | n/a | n/a |
| Negative | **-1.75(-2.86,-0.65)** | **0.017114*** |
| HFRS | Positive | **0.02(0.01,0.04)** | **0.0391*** |
| Negative | -0.01(-0.06,0.05) | 0.822 |
| Measles | Positive | **2.17(0.70,3.64)** | **0.0235*** |
| Negative | -0.02(-2.09,2.06) | 0.988 |
| Mortality | AIDS | Positive | **0.11(0.06,0.16)** | **0.00419**** |
| Negative | **-0.46(-0.76,-0.16)** | **0.01892*** |
| Influenza | Positive | **-0.23(-0.38,-0.09)** | **0.0160*** |
| Negative | **-0.29(-0.44,-0.14)** | **0.00762**** |
| HFRS | Positive | n/a | n/a |
| Negative | **-0.003(-0.005,-0.001)** | **0.01354*** |
| ** P < 0.01，* P < 0.05 | |  |  |  |
| Bold font indicates statistical significance at the 0.05 level. | | | |  |

**Table 4** Comparison of results from the survey-weighted single pollution analyses and WQS regression of the matrix specific pollutions mixtures for incidence threshold and mortality of the explicit diseases. The parameter estimate (β) is reported in bold for significant single pollution or WQS mixture effects. The components with the highest weights are reported for mixtures with significant effects.

| Series | Diseases | Direction | Mixtures | Single pollution regression survey-weighted | |  | Multiple pollution regression survey-weighted | |
| --- | --- | --- | --- | --- | --- | --- | --- | --- |
| βWQS (95%CI) | p-Value |  | βWQS (95%CI) | p-Value |
| Incidence  threshold | Influenza | Negative | Industrial wastewater discharge | -0.14（-0.41，0.14） | 0.366 |  | -121.91（-241.51，-2.31） | 0.0859 |
| Wind speed | 385.5（-2399.46，3170.46） | 0.795 |  |
| HFRS | Positive | SO2 | n/a | n/a |  | 0.008（0.001，0.016） | 0.0611 |
| Industrial wastewater discharge | 0.000012（-0.000011，0.000035） | 0.342 |  |
| Negative | Harmless treatment ratio for house refuse | **-0.005（-0.007，-0.003）** | **0.00289**** |  | 0.0046（-0.0377，0.0469） | 0.837 |
| SO2 | 0.00106（-0.00004，0.00216） | 0.108 |  |
| Measles | Positive | NO2 | 0.15（0.02，0.28） | 0.062 |  | **0.82（0.18，1.46）** | **0.0411*** |
| PM10 | 0.08（0.02，0.15） | 0.0533 |  |
| SO2 | 0.07（-0.13，0.29） | 0.49 |  |
| Negative | Fecal cleansing amount | -0.04（-0.10，0.02） | 0.2569 |  | 0.13（-1.26，1.52） | 0.8574 |
| NO2 | **0.13（0.06，0.21）** | **0.0125*** |  |
| Mortality | Influenza | Positive | Industrial wastewater discharge | **-0.00012（-0.00019，-0.00005）** | **0.0183*** |  | 0.042（-0.072，0.157） | 0.493 |
| NO2 | **-0.013（-0.019，-0.007）** | **0.00540**** |  |
| Sewage treatment rate | **0.015（0.003，0.027）** | **0.0469*** |  |
| Harmless treatment ratio for house refuse | 0.035（-0.051，0.121） | 0.453 |  |
| Negative | Wind speed | n/a | n/a |  | n/a | n/a |
| Harmless treatment ratio for house refuse | 0.018（-0.038，0.075） | 0.552 |  |
| Sewage treatment rate | 0.023（-0.007，0.054） | 0.192 |  |
| Domestic waste output | **0.0012 （0.0003，0.0020）** | **0.0341*** |  |
| HFRS | Negative | NO2 | n/a | n/a |  | -0.0012（-0.0035，0.0010） | 0.323 |
| Sewage treatment rate | -0.00013（-0.00028，0.00001） | 0.109 |  |
| ** P< 0.01，* P< 0.05 | | |  |  |  |  |  |  |
| Bold font indicates statistical significance at the 0.05 level. | | | |  |  |  |  |  |

**Table 5** Comparison of results from the survey-weighted single pollution analyses and WQS regression of the matrix specific pollutions mixtures for incidence threshold and mortality of the latent diseases. The parameter estimate (β) is reported in bold for significant single pollution or WQS mixture effects. The components with the highest weights are reported for mixtures with significant effects.

| Series | Diseases | Direction | Mixtures | Single pollution regression survey-weighted | |  | Multiple pollution regression survey-weighted | |
| --- | --- | --- | --- | --- | --- | --- | --- | --- |
| βWQS (95%CI) | p-Value |  | βWQS (95%CI) | p-Value |
| Incidence  threshold | AIDS | Positive | Domestic waste output | -0.00065（-0.00278，0.00149） | 0.5741 |  | **0.33（0.19，0.46）** | **0.00213**** |
| Air pressure | 0.38（-0.14，0.90） | 0.205 |  |
| Negative | Road traffic trunk noise | **-1.22（-1.98，-0.46）** | **0.020*** |  | -0.23（-0.92，0.46） | 0.5329 |
| Air pressure | **0.69（0.34，1.04）** | **0.00839**** |  |
| HFMD | Positive | Industrial wastewater discharge | **0.050（0.016，0.083）** | **0.0336*** |  | 6.15（-4.67，16.98） | 0.308 |
| Harmless treatment ratio for house refuse | 11.51（-0.06，0.25） | 0.234 |  |
| Negative | Sunshine duration | 0.096（-0.055，0.248） | 0.26853 |  | **-16.17（-27.26，-5.08）** | **0.02892*** |
| Harmless treatment ratio for house refuse | 5.45（-3.79，14.69） | 0.2999 |  |
| Viral hepatitis | Negative | Fecal cleansing amount | -0.024（-0.122，0.073） | 0.6403 |  | -0.83（-1.81，0.15） | 0.13976 |
| Harmless treatment ratio for house refuse | -0.529（-1.055，-0.003） | 0.0964 |  |
| Sewage treatment rate | -0.094（-0.275，0.086） | 0.344 |  |
| Mortality | AIDS | Positive | Harmless treatment ratio for house refuse | -0.016（-0.064，0.031） | 0.5183 |  | **0.095（0.051，0.139）** | **0.00399**** |
| Sewage treatment rate | **0.034（0.012，0.055）** | **0.0213*** |  |
| Domestic waste output | **0.0012（0.0006，0.0018）** | **0.00757**** |  |
| Negative | PM10 | -0.0028（-0.0065，0.0009） | 0.191 |  | **-0.115（-0.163，-0.066）** | **0.002331**** |
| SO2 | -0.0048（-0.0146，0.0049） | 0.36917 |  |
| Wind speed | -0.022（-1.148，1.102） | 0.9698 |  |
| ** P< 0.01，* P<0.05 | |  |  |  |  |  |  |  |
| Bold font indicates statistical significance at the 0.05 level. | | | |  |  |  |  |  |
