# Supplementary material
Source: Research Square preprint supplement (doi:10.21203/rs.3.rs-9246216/v1)
Supplement: Supplementary file 2 [file d998226538c9fbc26bd88fda.doc]

**Supplementary material**

**Contents**

**1.Figure S1** Correlation map among the pollutions, climate factors and incidence threshold of six viral infectious diseases. Heat Map shows the Spearman correlation coefficients (r) between each environmental factor.…………………………………S1

**2.Figure S2** Correlation map among the pollutants, climate factors and mortality of six viral infectious diseases. Heat Map shows the Spearman correlation coefficients (r) between each environmental factor.…………………………………………………S2

**3.Table S1** Screening results of parameter δ value in six viral infectious diseases…………………………. …………………………………………………. S3

**4.Table S2** Multivariate analysis of the association of HFMD diseases and concentration changes in pollutions.………………………………………………...S4

**5.Table S3** Comparisons of different series of pollutions for six viral infectious diseases in the incidence threshold and mortality…………………………….……..S5

**Figure S1** Correlation map among the pollutions, climate factors and incidence threshold of six viral infectious diseases. Heat map shows the Spearman correlation coefficients (r) between each environmental factor.


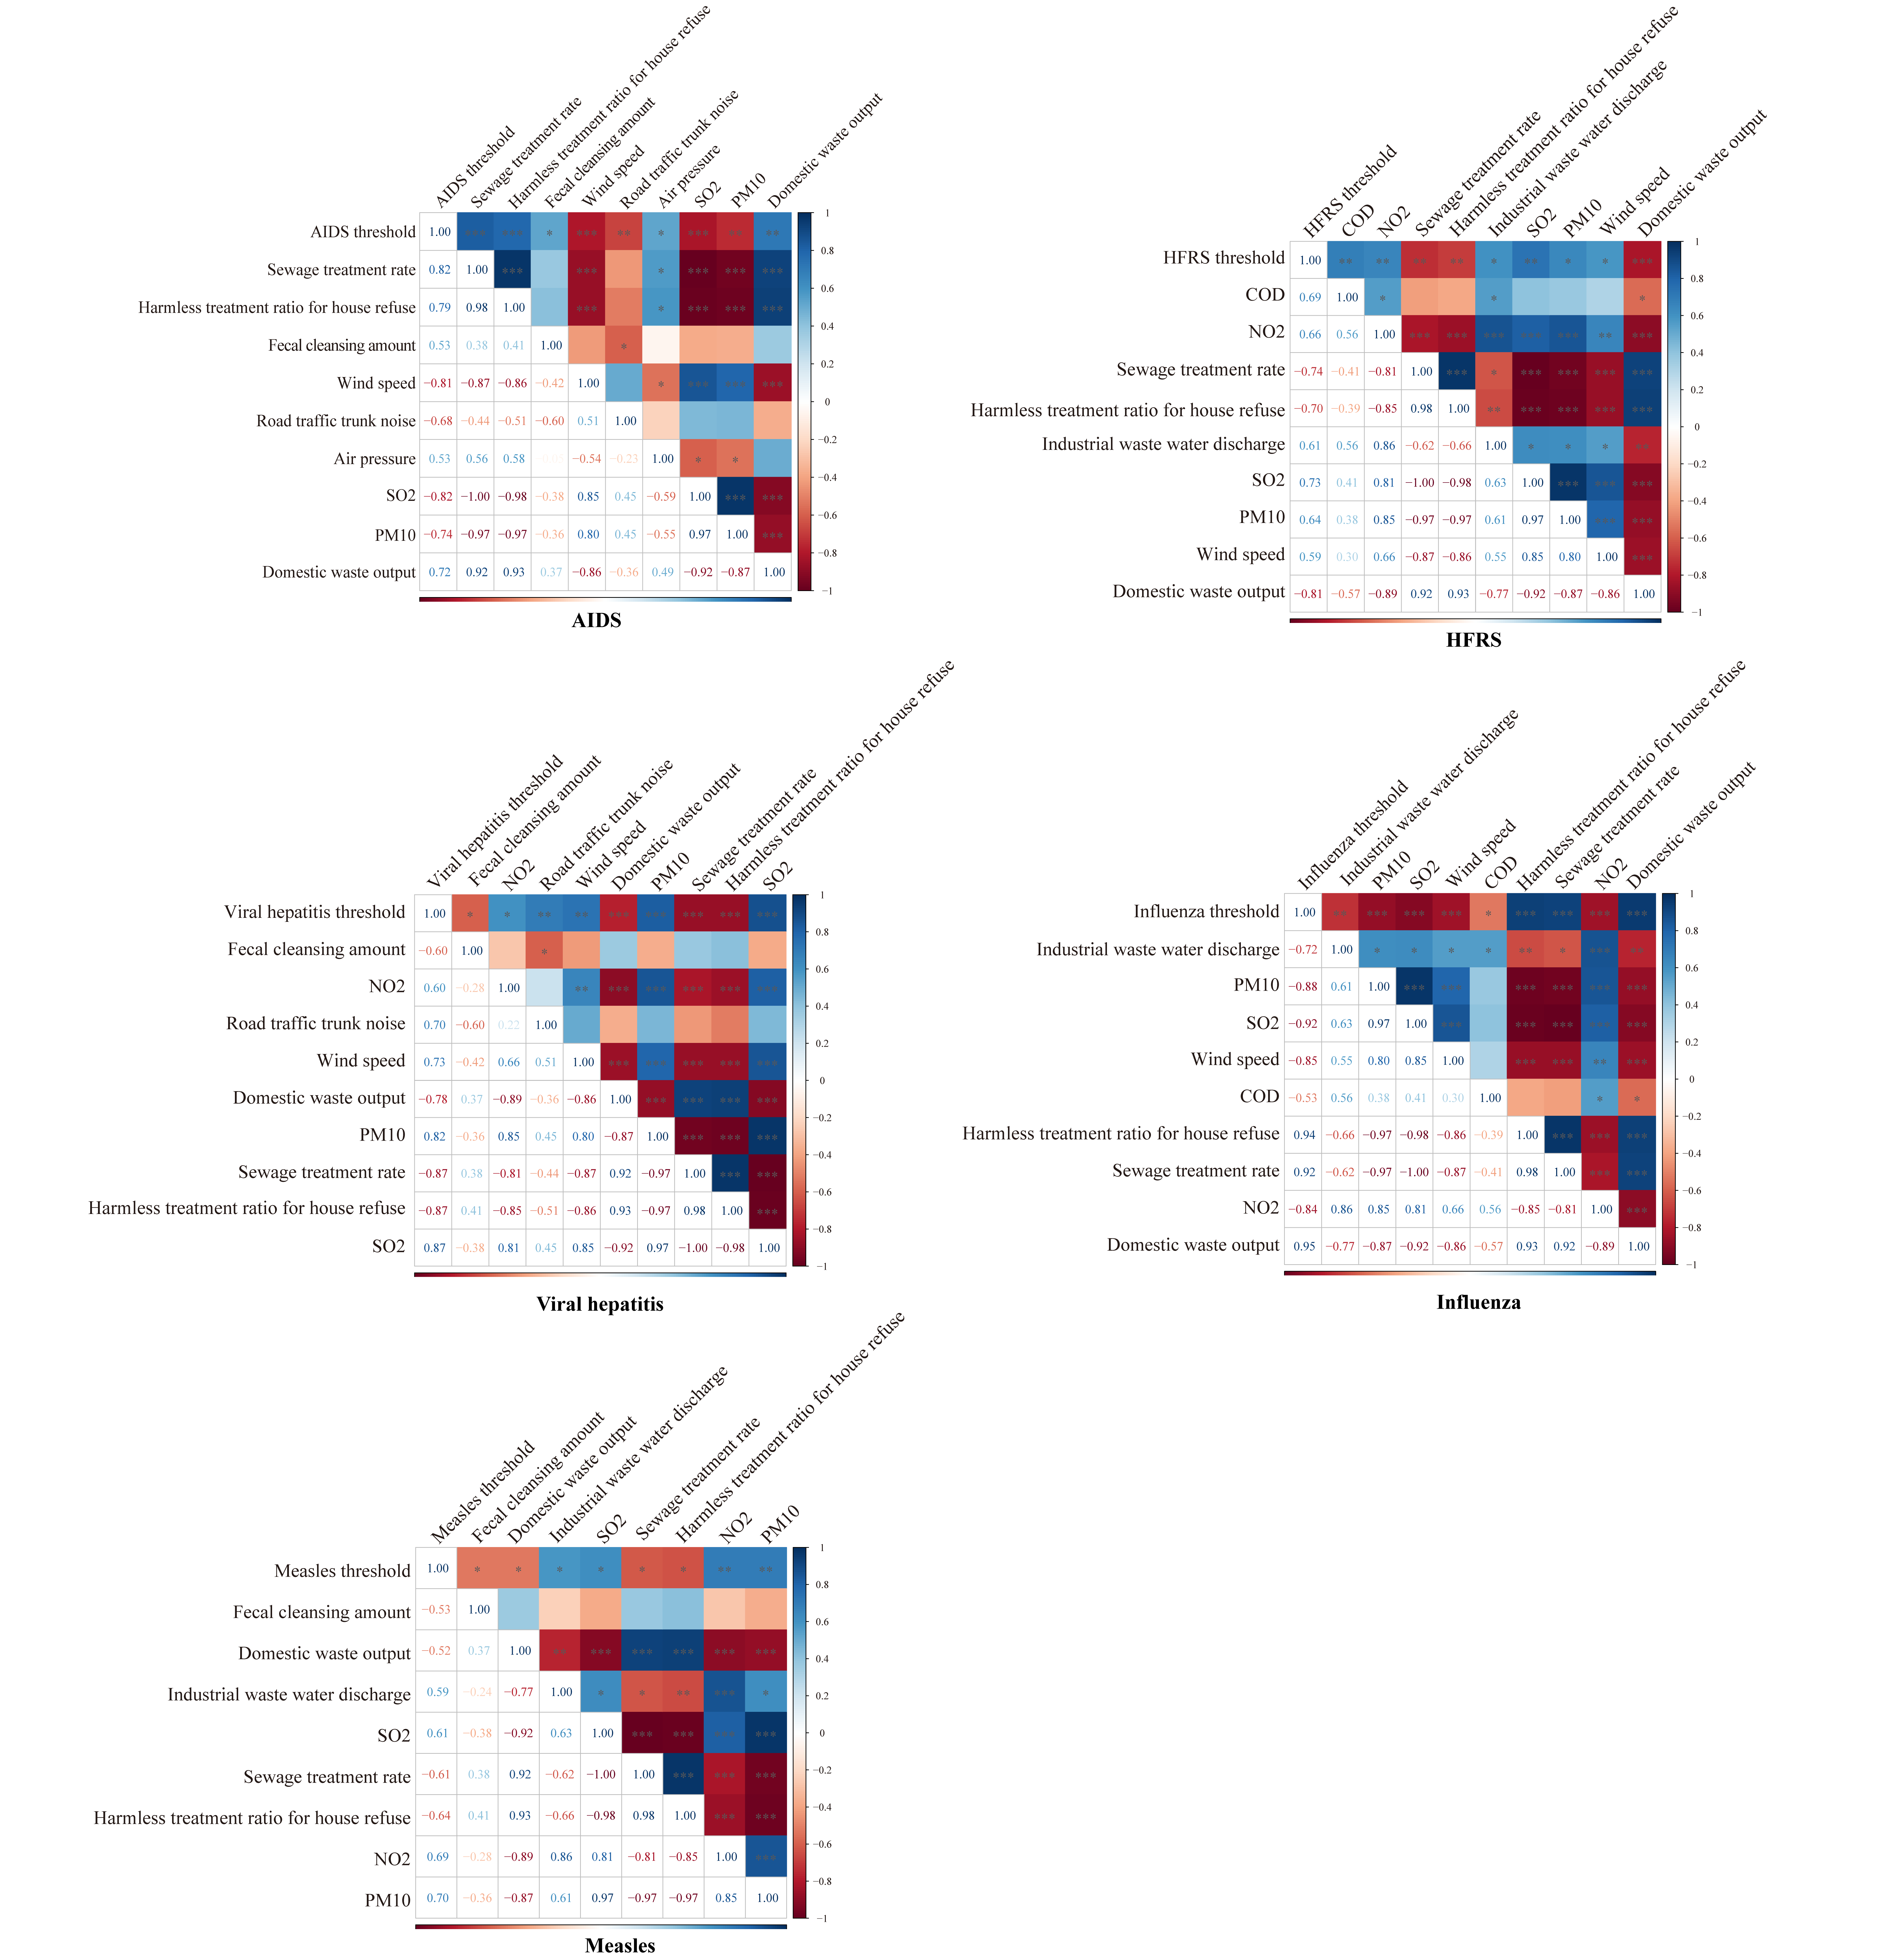


**Figure S2** Correlation map among the pollutants, climate factors and mortality of six viral infectious diseases. Heat map shows the Spearman correlation coefficients (r) between each environmental factor.


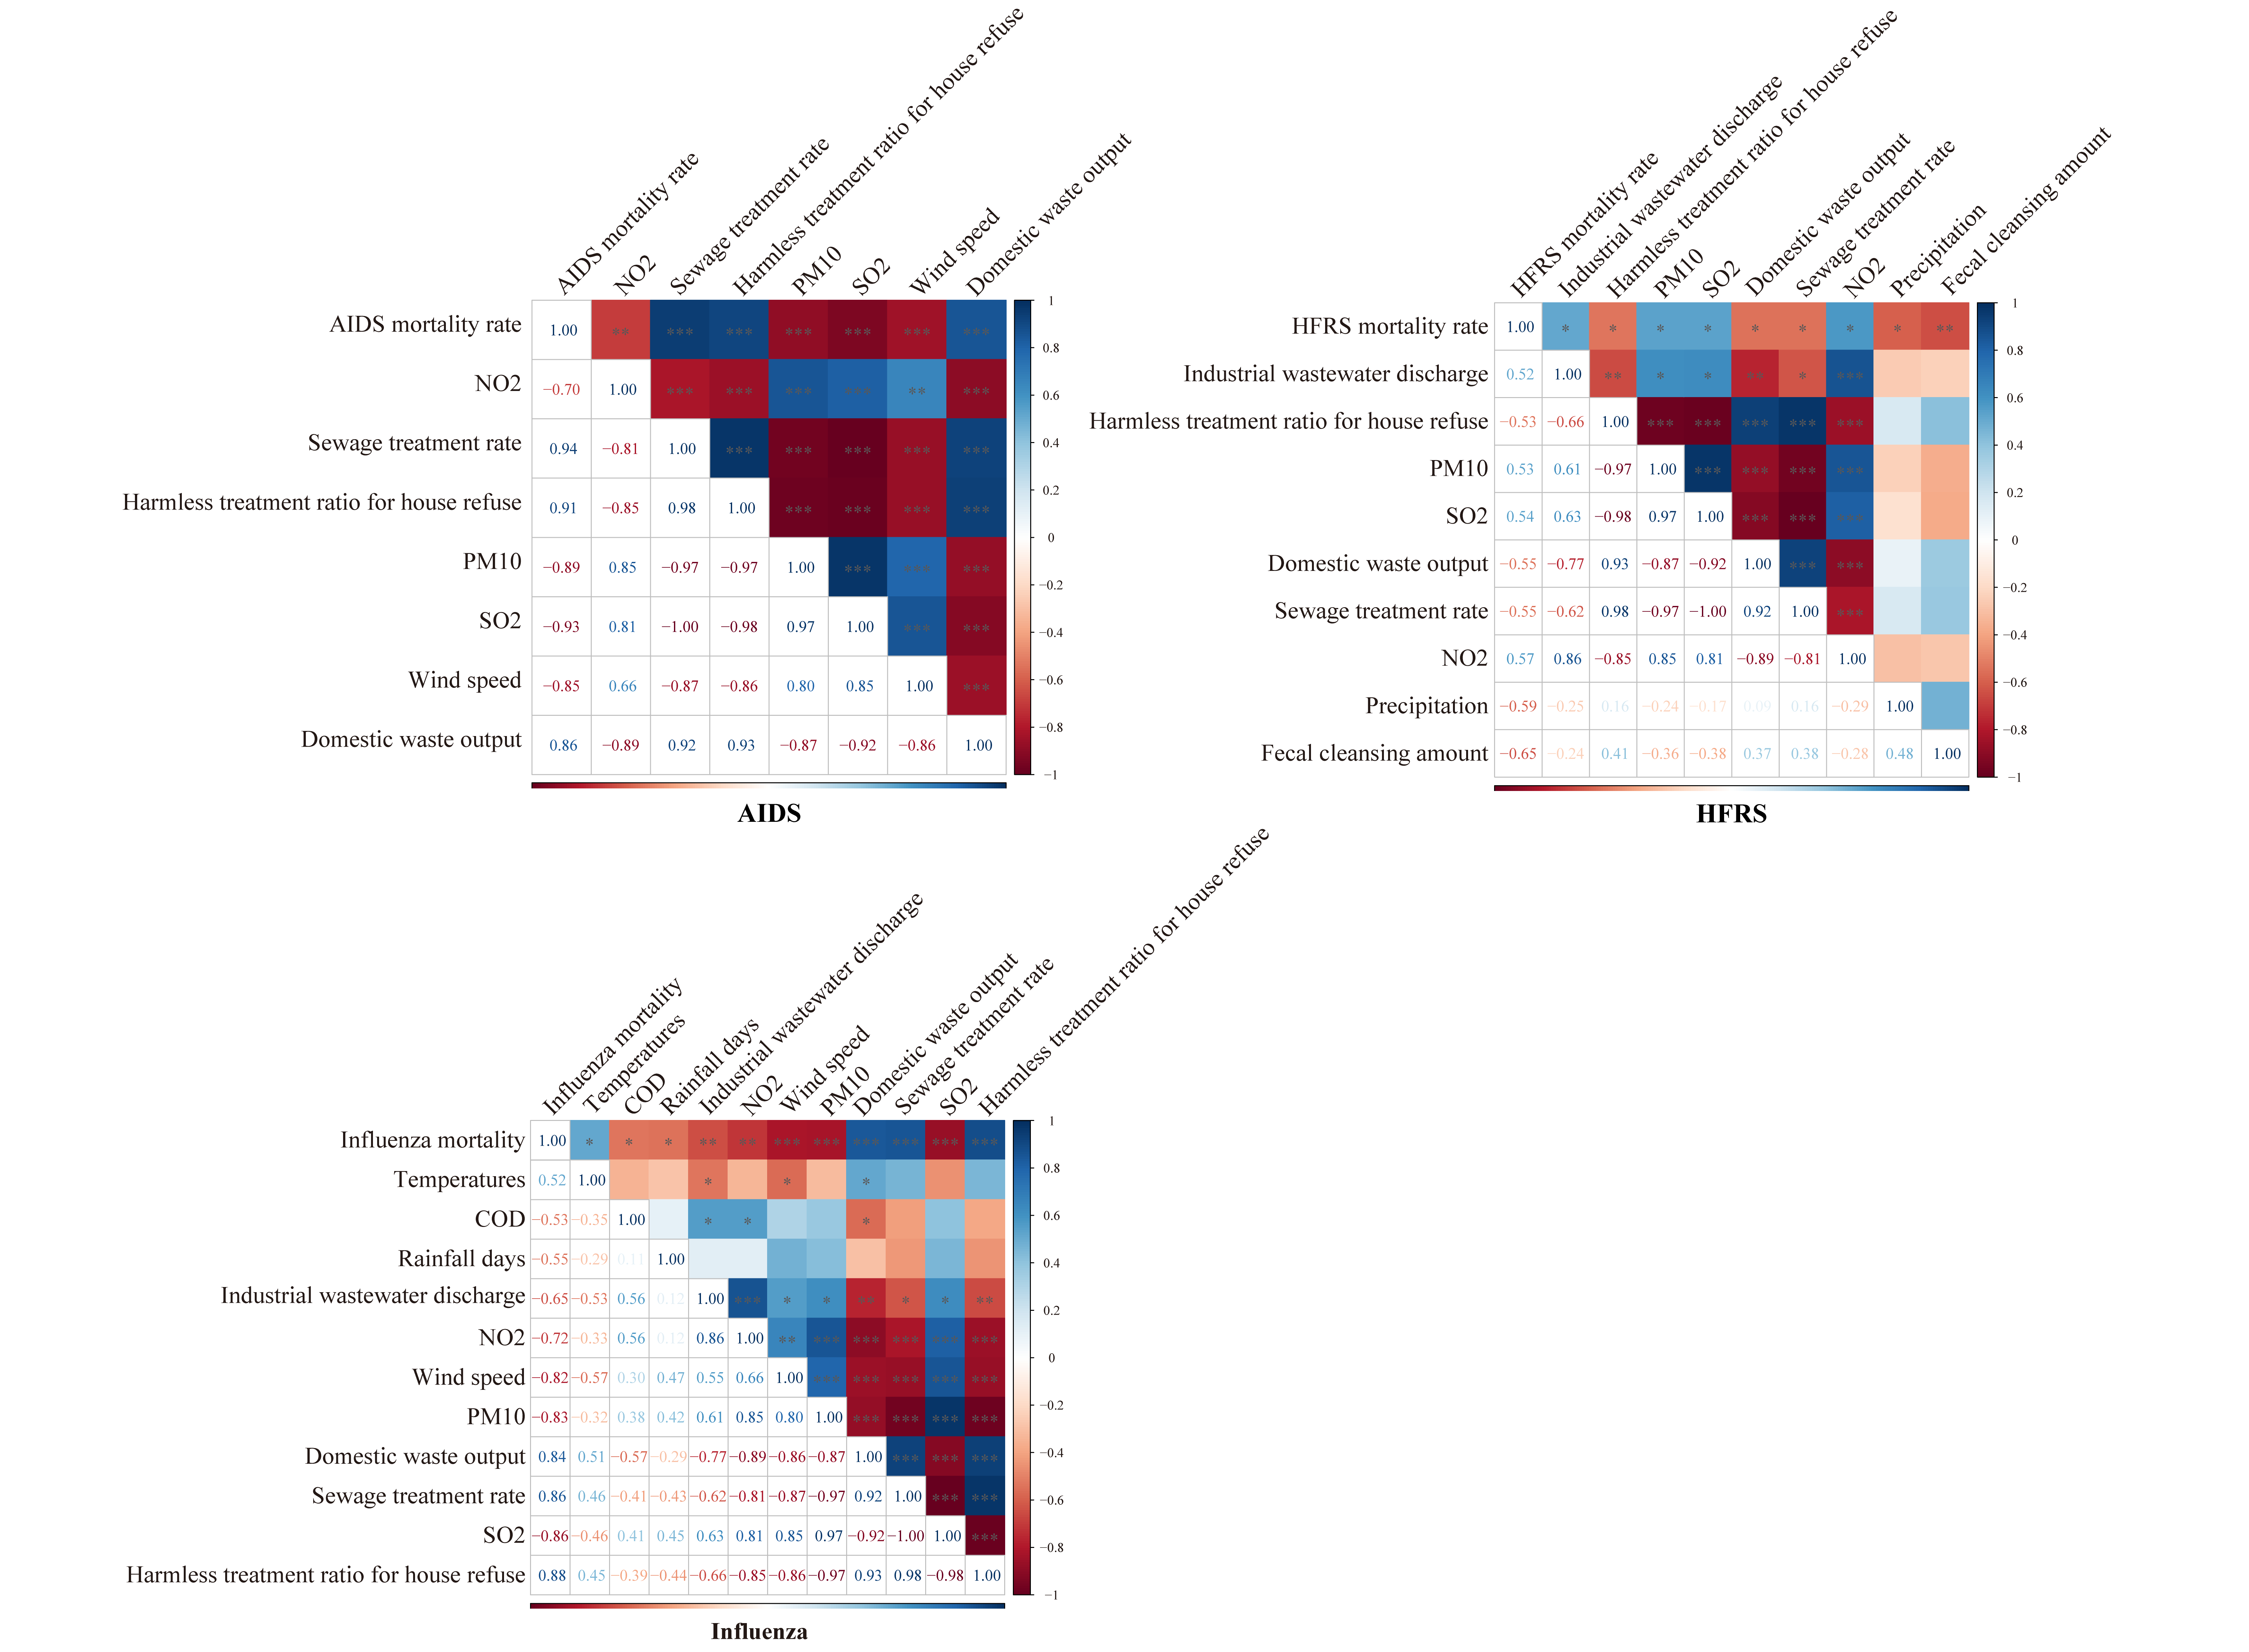


**Table S1** Screening results of parameter δ value in six viral infectious diseases

| Diseases | Series | Sensitivity | Specificity | PPV | NPV | MCC | YI |
| --- | --- | --- | --- | --- | --- | --- | --- |
| AIDS | δ=6.0 | 0.68 | 0.73 | 0.94 | 0.27 | 0.29 | 0.41 |
|  | Model | 0.68 | 0.73 | 0.94 | 0.43 | 0.29 | 0.41 |
| Influenza | δ=6.0 | 0.25 | 0.95 | 0.67 | 0.77 | 0.30 | 0.20 |
|  | Model | 0.25 | 0.95 | 0.67 | 0.77 | 0.30 | 0.20 |
| HFMD | δ=4.9 | 0.74 | 0.92 | 0.91 | 0.78 | 0.67 | 0.66 |
|  | Model | 0.74 | 0.92 | 0.91 | 0.78 | 0.67 | 0.66 |
| Viral hepatitis | δ=7.4 | 0.11 | 0.92 | 0.84 | 0.23 | 0.05 | 0.04 |
|  | Model | 0.11 | 0.94 | 0.96 | 0.07 | 0.04 | 0.05 |
| HFRS | δ=5.3 | 0.45 | 0.80 | 0.81 | 0.43 | 0.24 | 0.25 |
|  | Model | 0.45 | 0.80 | 0.81 | 0.43 | 0.24 | 0.25 |
| Measles | δ=7.5 | 0.53 | 0.94 | 0.89 | 0.67 | 0.51 | 0.47 |
|  | Model | 0.94 | 0.89 | 0.67 | 8.57 | 0.51 | 0.47 |
| PPV:Positive predictive value, NPV:Negative predictive value | | | | | |  |  |
| MCC:Matthews correlation coefficient, YI:Youdens index | | | | |  |  |  |
| AIDS:Acquired Immune Deficiency Syndrome, HFMD:Hand,foot,and mouth disease | | | | | | | |
| HFRS:Hemorrhagic fever with renal syndrome | | | |  |  |  |  |

**Table S2** Multivariate analysis of the association of HFMD diseases and concentration changes in pollutions.

| Parameters | Coefficients |
| --- | --- |
| Industrial wastewater discharge | 2.12E-03 |
| Harmless treatment ratio for house refuse | 6.21E+00 |
| Precipitation | 4.50E-02 |
| Temperatures | -5.72E+00 |
| Sunshine duration | -9.60E-02 |
| Windy days | 8.36E-01 |
| Model parameters | λ=1.09051 CV=5 |

**Table S3** Comparisons of different series of pollutions for six viral infectious diseases in the incidence threshold and mortality

| Series | Diseases | Series of pollutants | Weights level |
| --- | --- | --- | --- |
| Incidence threshold | AIDS | Noise | 1 |
| Life | 2 |
| Influenza | Water | 1 |
| HFMD | Life | 1 |
| Water | 2 |
| Viral hepatitis | Life | 1 |
| Water | 2 |
| HFRS | Chemicals | 1 |
| Life | 2 |
| Water | 3 |
| Measles | Chemicals | 1 |
| Life | 2 |
| Mortality | AIDS | Chemicals | 1 |
| Life | 2 |
| Water | 3 |
| Influenza | Life | 1 |
| Water | 2 |
| Chemicals | 3 |
| HFRS | Water | 1 |
| Chemicals | 2 |
